# Supplementary material for: Direct growth of Cr-doped TiO2 nanosheet arrays on stainless steel substrates with visible-light photoelectrochemical properties
Source: Royal Society of Chemistry journal article supplement (doi:10.1039/c7nj03830e), 2017-12-07
Supplement: c7nj03830e1.pdf [file c7nj03830e1.pdf]

## Supporting Information

### **Direct Growth of Cr-doped TiO<sub>2</sub> Nanosheet Arrays on Stainless Steel with Visible-Light Photoelectrochemical Properties<sup>†</sup>**

**Guobing Mao,<sup>#a</sup> Miao Xu,<sup>#a</sup> Shuyang Yao,<sup>a</sup> Beibei Zhou,<sup>a</sup> Qi Liu<sup>\*a</sup>**

*<sup>a</sup> Department of materials science and Engineering, Anhui Polytechnic University,  
Wuhu, Anhui 241000, P. R. China.*

*Fax: +86 553 2871 252 ; Tel: +86 553 2871 252*

*E-mail: modieer\_67@ahpu.edu.cn*

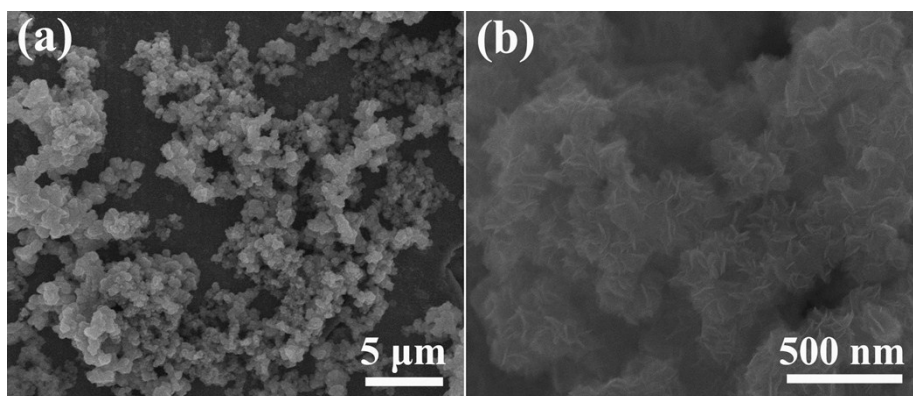

**Fig.S1** SEM images of the sample prepared at 180°C for 72 h without tetramethylammonium hydroxide.

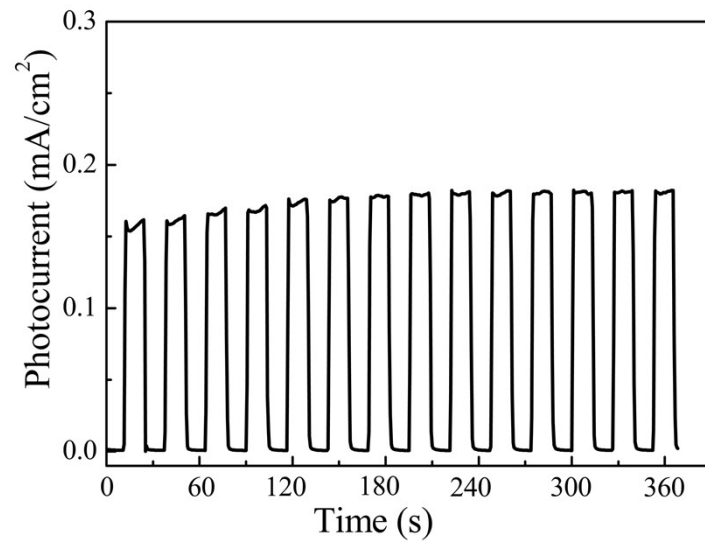

**Fig. S2** Transient photocurrent response of reused Cr-TiO<sub>2</sub> film (36 h, annealed at 600°C ) under visible light illumination.

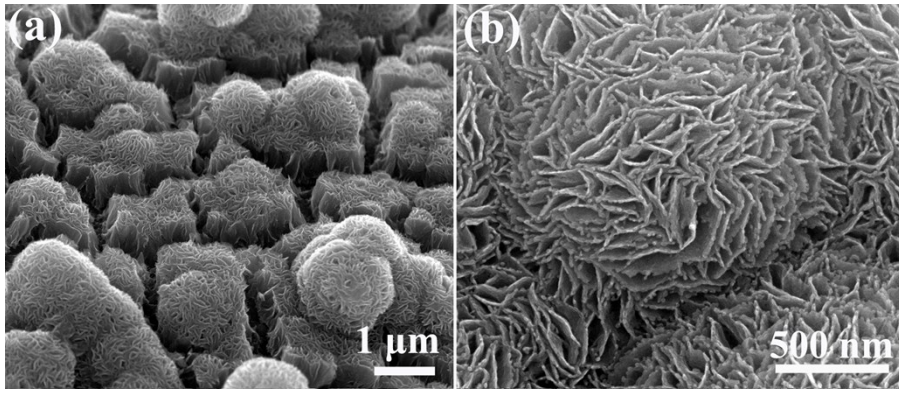

**Fig.S3** Typical SEM images of the Cr-TiO<sub>2</sub> film (36 h) annealed at 600°C for 4h.

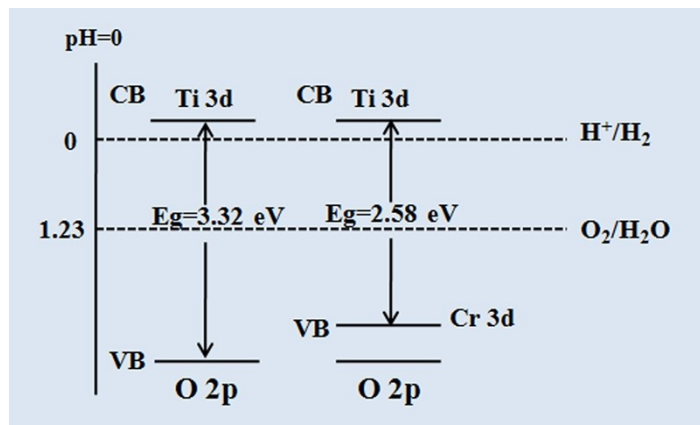

Fig.S4 Schematic band structures of  $\text{TiO}_2$  and  $\text{Cr}$ -doped  $\text{TiO}_2$
